# Supplementary material for: Secretome Identifies Tenascin-X as a Potent Marker of Ovarian Cancer
Source: Hindawi journal article supplement (doi:10.1155/2015/208017), 2015-01-01

**Supplementary data**

**Supplementary figure 1:** *Standard curve for increasing amounts of tenascin X (ELISA, cusabio).*

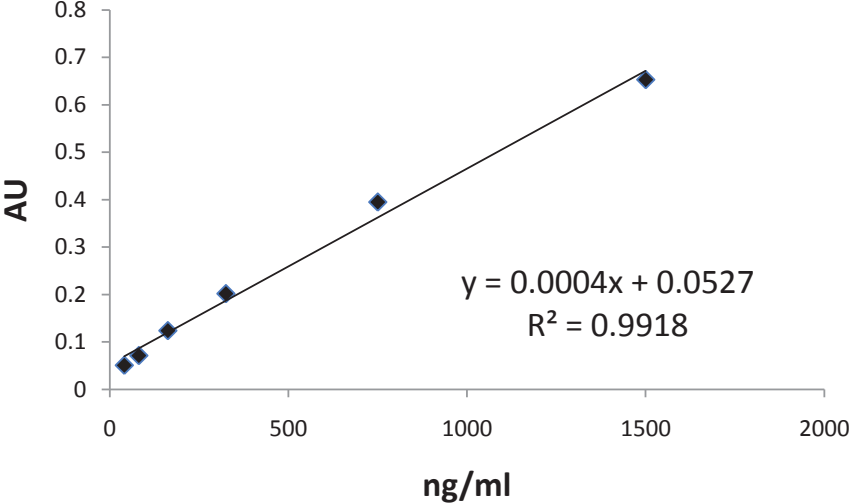

**Supplementary figure 2:** *Investigation of the potential clinical value of tenascin X using 3 different publically available datasets.*

PROGene website was used to investigate the correlation of mRNA levels of tenascin X survival and overall survival in ovarian cancer.

(<http://watson.compbio.iupui.edu/chirayu/progene/database/?url=progene>)

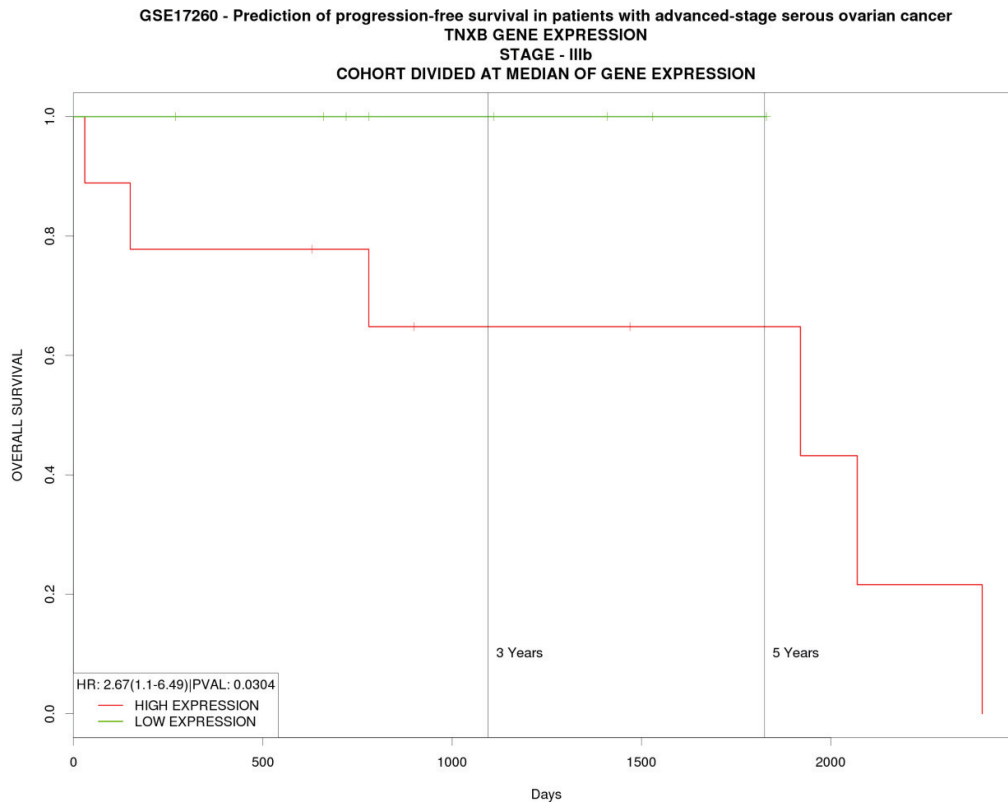

GSE26712 - A Gene Signature Predicting for Survival in Suboptimally Debulked Patients with Ovarian Cancer  
TNXB GENE EXPRESSION  
COHORT DIVIDED AT MEAN OF GENE EXPRESSION

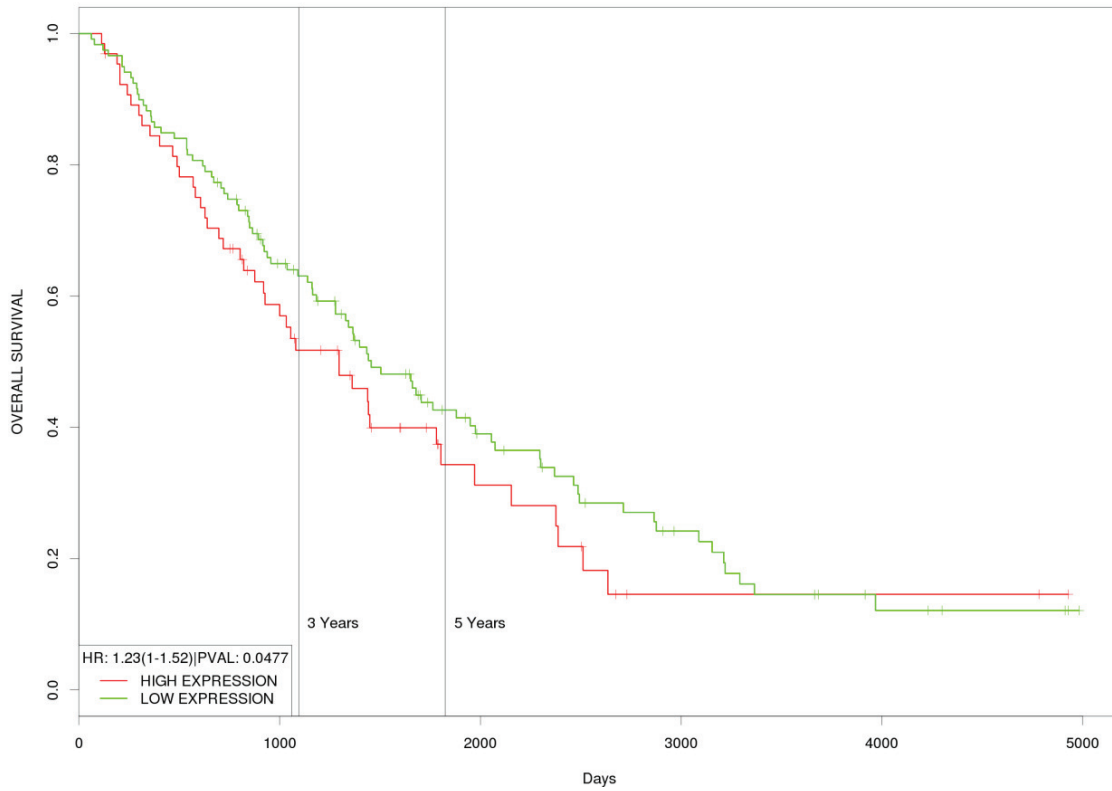

GSE17260 - Prediction of progression-free survival in patients with advanced-stage serous ovarian cancer  
TNXB GENE EXPRESSION  
STAGE - IIIb  
COHORT DIVIDED AT MEAN OF GENE EXPRESSION

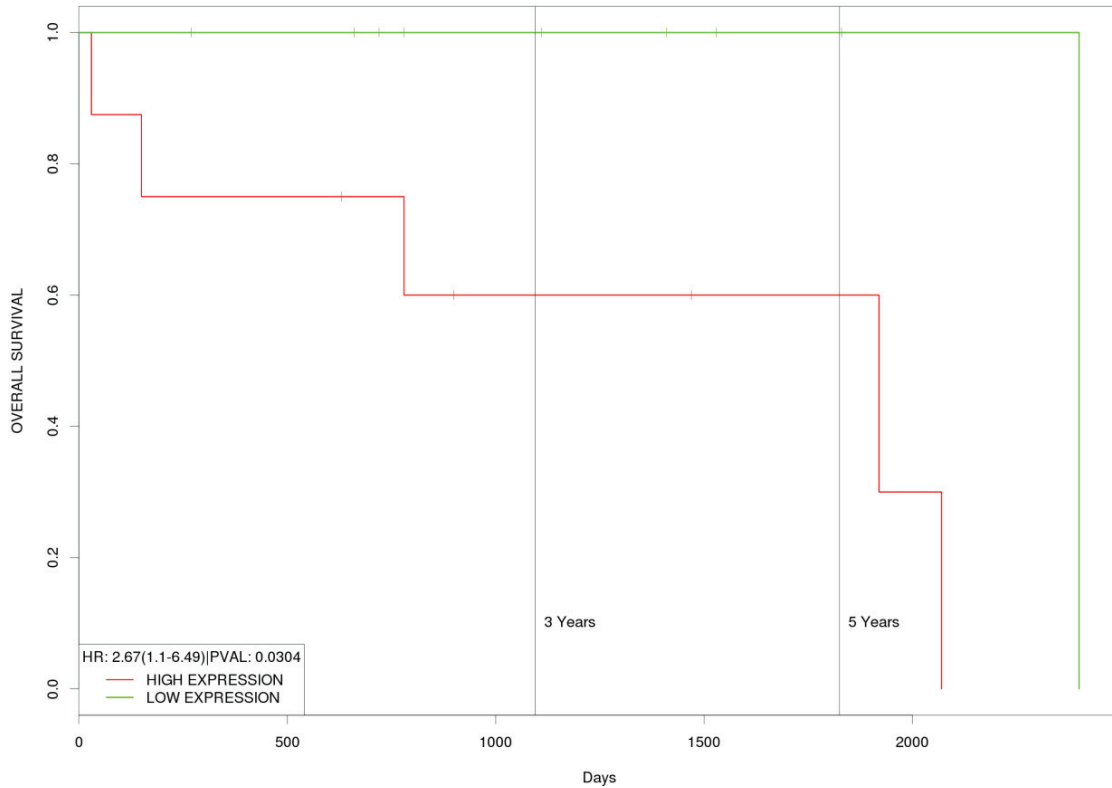

Supplement: f1 [file 208017.f1.pdf]
